# Supplementary material for: Molecular Detection of Antimalarial Drug Resistance in Plasmodium vivax from Returned Travellers to NSW, Australia during 2008–2018
Source: PubMed Central journal article supplement (PMC7168284; doi:10.3390/pathogens9020101), 2020-02-05
Supplement: pathogens-09-00101-s001.pdf [file pathogens-09-00101-s001.pdf]

## Supplementary Materials

**Table S1:** The number of successful sequences obtained from 120 clinical samples.

| Countries    | Target genes  |                |               |               |
|--------------|---------------|----------------|---------------|---------------|
|              | <i>Pvmdr1</i> | <i>Pvcrt-o</i> | <i>Pvdhfr</i> | <i>Pvdhps</i> |
| India        | 51            | 48             | 50            | 54            |
| PNG          | 29            | 20             | 33            | 34            |
| Pakistan     | 17            | 10             | 17            | 17            |
| Indonesia    | 5             | 4              | 5             | 5             |
| Thailand     | 2             | 2              | 2             | 2             |
| Solomon      | 2             | 2              | 2             | 2             |
| South Korea  | 1             | 0              | 1             | 1             |
| Cambodia     | 1             | 1              | 1             | 0             |
| SEAN         | 1             | 1              | 1             | 1             |
| <b>Total</b> | <b>109</b>    | <b>88</b>      | <b>112</b>    | <b>116</b>    |

*Pvmdr1* = *P. vivax* multidrug resistance gene

*Pvcrt-o* = *P. vivax* putative transporter protein gene

*Pvdhfr* = *P. vivax* dihydrofolate reductase gene

*Pvdhps* = *P. vivax* dihydropteroate synthase gene

**Table S2:** Total of targeted sequences obtained from clinical samples.

| ID   | Countries | Year | <i>Pvmdr1</i> |               | <i>Pvcrt-o</i>          | <i>Pvdhfr</i> |             |             |                |                | Repeat variants* | <i>Pvdhps</i> |              |                |              |              |
|------|-----------|------|---------------|---------------|-------------------------|---------------|-------------|-------------|----------------|----------------|------------------|---------------|--------------|----------------|--------------|--------------|
|      |           |      | <u>Y976F</u>  | <u>F1076L</u> | <u>K10</u><br>insertion | <u>F57L/I</u> | <u>S58R</u> | <u>T61M</u> | <u>S117T/N</u> | <u>I173L/F</u> |                  | <u>S382A</u>  | <u>A383G</u> | <u>K512M/E</u> | <u>A553G</u> | <u>V585A</u> |
| V235 | Pakistan  | 2008 | <u>F</u>      | <u>L</u>      | WT                      | F             | <u>R</u>    | T           | <u>N</u>       | I              | Type2            | S             | <u>G</u>     | K              | A            | V            |
| V255 | PNG*      | 2008 | <u>F</u>      | <u>L</u>      | WT                      | <u>L</u>      | <u>R</u>    | <u>M</u>    | <u>T</u>       | I              | Type3            | S             | A            | K              | A            | V            |
| V247 | PNG*      | 2008 | Y             | <u>L</u>      | WT                      | <u>L</u>      | <u>R</u>    | <u>M</u>    | <u>T</u>       | I              | Type3            | S             | A            | K              | A            | V            |
| V250 | PNG*      | 2008 | Y             | <u>L</u>      | WT                      | <u>L</u>      | <u>R</u>    | <u>M</u>    | <u>T</u>       | I              | Type3            | S             | A            | K              | A            | V            |
| V298 | Indonesia | 2008 | Y             | <u>L</u>      | WT                      | <u>L</u>      | <u>R</u>    | <u>M</u>    | <u>T</u>       | I              | Type3            | S             | A            | K              | A            | V            |
| V299 | India     | 2008 | Y             | <u>L</u>      | WT                      | F             | <u>R</u>    | T           | <u>N</u>       | I              | Type1            | S             | A            | K              | A            | V            |
| V225 | India     | 2008 | Y             | <u>L</u>      | WT                      | F             | S           | T           | S              | I              | Type2            | S             | A            | K              | A            | V            |
| V243 | India     | 2008 | Y             | <u>L</u>      | WT                      | F             | S           | T           | S              | I              | Type1            | S             | A            | K              | A            | V            |
| V249 | India     | 2008 | Y             | <u>L</u>      | WT                      | F             | S           | T           | S              | I              | Type1            | S             | A            | K              | A            | V            |
| V296 | India     | 2008 | Y             | <u>L</u>      | WT                      | F             | S           | T           | S              | I              | Type1            | S             | A            | K              | A            | V            |
| V303 | PNG*      | 2009 | <u>F</u>      | <u>L</u>      | WT                      | <u>L</u>      | <u>R</u>    | <u>M</u>    | <u>T</u>       | I              | Type3            | S             | A            | K              | A            | V            |
| V183 | India     | 2009 | Y             | <u>L</u>      | WT                      | <u>L</u>      | <u>R</u>    | <u>M</u>    | <u>T</u>       | I              | Type3            | S             | A            | K              | A            | V            |
| V301 | PNG*      | 2009 | Y             | <u>L</u>      | WT                      | <u>L</u>      | <u>R</u>    | <u>M</u>    | <u>T</u>       | I              | Type3            | S             | A            | K              | A            | V            |
| V202 | PNG*      | 2009 | Y             | <u>L</u>      | WT                      | F             | S           | T           | <u>N</u>       | I              | Type1            | S             | A            | K              | A            | V            |
| V197 | India     | 2009 | Y             | <u>L</u>      | WT                      | F             | S           | T           | S              | I              | Type1            | S             | A            | K              | A            | V            |
| V302 | India     | 2009 | Y             | <u>L</u>      | WT                      | F             | S           | T           | S              | I              | Type1            | S             | A            | K              | A            | V            |
| V163 | Thailand  | 2010 | Y             | <u>L</u>      | WT                      | F             | <u>R</u>    | T           | <u>N</u>       | I              | Type2            | S             | <u>G</u>     | K              | <u>G</u>     | V            |
| V174 | India     | 2010 | Y             | <u>L</u>      | WT                      | F             | <u>R</u>    | T           | <u>N</u>       | I              | Type1            | S             | <u>G</u>     | K              | <u>G</u>     | V            |
| V162 | PNG*      | 2010 | <u>F</u>      | <u>L</u>      | WT                      | <u>L</u>      | <u>R</u>    | <u>M</u>    | <u>T</u>       | I              | Type3            | S             | A            | K              | A            | V            |
| V180 | India     | 2010 | Y             | <u>L</u>      | WT                      | F             | <u>R</u>    | T           | <u>N</u>       | I              | Type1            | S             | A            | K              | A            | V            |
| V177 | India     | 2010 | Y             | <u>L</u>      | WT                      | F             | S           | T           | S              | I              | Type2            | S             | A            | K              | A            | V            |
| V156 | PNG*      | 2010 |               |               | WT                      | <u>L</u>      | <u>R</u>    | <u>M</u>    | <u>T</u>       | I              | Type3            | S             | A            | K              | A            | V            |
| V158 | PNG*      | 2010 | <u>F</u>      | <u>L</u>      |                         | F             | <u>R</u>    | T           | <u>N</u>       | I              | Type1            | S             | A            | K              | A            | V            |

|      |           |      |          |          |          |          |          |          |          |   |       |   |          |   |   |   |
|------|-----------|------|----------|----------|----------|----------|----------|----------|----------|---|-------|---|----------|---|---|---|
| V167 | India     | 2010 | Y        | <u>L</u> |          | F        | <u>R</u> | T        | <u>N</u> | I | Type1 | S | A        | K | A | V |
| V165 | PNG*      | 2010 | <u>F</u> | <u>L</u> |          |          |          |          |          |   |       | S | A        | K | A | V |
| V132 | PNG*      | 2011 | <u>F</u> | <u>L</u> | WT       | <u>L</u> | <u>R</u> | <u>M</u> | <u>T</u> | I | Type3 | S | A        | K | A | V |
| V340 | PNG*      | 2011 | <u>F</u> | <u>L</u> | WT       | <u>L</u> | <u>R</u> | <u>M</u> | <u>T</u> | I | Type3 | S | A        | K | A | V |
| V130 | Solomon*  | 2011 | <u>F</u> | <u>L</u> | WT       | <u>L</u> | <u>R</u> | <u>M</u> | <u>T</u> | I | Type3 | S | A        | K | A | V |
| V335 | PNG*      | 2011 | <u>F</u> | <u>L</u> | WT       | <u>L</u> | <u>R</u> | T        | S        | I | Type1 | S | A        | K | A | V |
| V330 | PNG*      | 2011 | Y        | <u>L</u> | WT       | <u>L</u> | <u>R</u> | T        | S        | I | Type1 | S | A        | K | A | V |
| V147 | Indonesia | 2011 | <u>F</u> | <u>L</u> | WT       | F        | S        | T        | S        | I | Type1 | S | A        | K | A | V |
| V331 | PNG*      | 2011 | <u>F</u> | <u>L</u> | WT       | F        | S        | T        | S        | I | Type1 | S | A        | K | A | V |
| V329 | PNG*      | 2011 | Y        | <u>L</u> | WT       | F        | S        | T        | S        | I | Type1 | S | A        | K | A | V |
| V341 | PNG*      | 2011 |          |          | WT       | F        | S        | T        | S        | I | Type1 | S | A        | K | A | V |
| V322 | PNG*      | 2011 | <u>F</u> | <u>L</u> |          | <u>L</u> | <u>R</u> | T        | S        | I | Type1 | S | A        | K | A | V |
| V324 | PNG*      | 2011 | <u>F</u> | <u>L</u> |          | <u>L</u> | <u>R</u> | <u>M</u> | <u>T</u> | I | Type3 | S | A        | K | A | V |
| V325 | PNG*      | 2011 | <u>F</u> | <u>L</u> |          | <u>L</u> | <u>R</u> | <u>M</u> | <u>T</u> | I | Type3 | S | A        | K | A | V |
| V327 | PNG*      | 2011 | <u>F</u> | <u>L</u> |          | <u>L</u> | <u>R</u> | <u>M</u> | <u>T</u> | I | Type3 | S | A        | K | A | V |
| V336 | PNG*      | 2011 | <u>F</u> | <u>L</u> |          | F        | S        | T        | S        | I | Type1 | S | A        | K | A | V |
| V338 | PNG*      | 2011 | <u>F</u> | <u>L</u> |          | F        | S        | T        | S        | I | Type1 | S | A        | K | A | V |
| V134 | Cambodia  | 2011 | Y        | <u>L</u> | <u>K</u> | F        | <u>R</u> | T        | <u>N</u> | I | Type2 |   |          |   |   |   |
| V343 | PNG*      | 2011 |          |          |          | F        | S        | T        | S        | I | Type1 | S | A        | K | A | V |
| V339 | PNG*      | 2011 |          |          |          | F        | S        | T        | S        | I | Type1 | S | A        | K | A | V |
| V323 | PNG*      | 2011 |          |          |          | <u>L</u> | <u>R</u> | T        | S        | I | Type1 | S | A        | K | A | V |
| V320 | PNG*      | 2011 |          |          |          | <u>L</u> | <u>R</u> | <u>M</u> | <u>T</u> | I | Type3 | S | A        | K | A | V |
| V328 | PNG*      | 2011 | <u>F</u> | <u>L</u> |          |          |          |          |          |   |       | S | A        | K | A | V |
| V142 | India     | 2011 | Y        | <u>L</u> |          |          |          |          |          |   |       | S | A        | K | A | V |
| V117 | Indonesia | 2012 | <u>F</u> | <u>L</u> | WT       | F        | S        | T        | S        | I | Type1 | S | <u>G</u> | K | A | V |
| V149 | India     | 2012 | Y        | <u>L</u> | WT       | F        | <u>R</u> | T        | <u>N</u> | I | Type1 | S | A        | K | A | V |
| V126 | India     | 2012 | Y        | <u>L</u> | WT       | F        | S        | T        | <u>N</u> | I | Type1 | S | A        | K | A | V |
| V119 | Pakistan  | 2012 | Y        | F        | WT       | F        | <u>R</u> | T        | <u>N</u> | I | Type1 | S | A        | K | A | V |
| V151 | India     | 2012 | Y        | <u>L</u> | WT       | F        | S        | T        | S        | I | Type1 | S | A        | K | A | V |

|      |           |      |   |          |          |          |          |          |          |   |       |   |          |   |          |   |
|------|-----------|------|---|----------|----------|----------|----------|----------|----------|---|-------|---|----------|---|----------|---|
| V127 | Pakistan  | 2012 | Y | <u>L</u> | WT       | F        | S        | T        | S        | I | Type1 | S | A        | K | A        | V |
| V150 | Pakistan  | 2012 | Y | <u>L</u> | WT       | F        | S        | T        | S        | I | Type3 | S | A        | K | A        | V |
| V128 | Pakistan  | 2012 | Y | F        | WT       | F        | S        | T        | S        | I | Type2 | S | A        | K | A        | V |
| V102 | India     | 2013 | F | <u>L</u> | WT       | <u>I</u> | <u>R</u> | <u>M</u> | <u>T</u> | I | Type1 | S | <u>G</u> | K | <u>G</u> | V |
| V93  | India     | 2013 | Y | <u>L</u> | <u>K</u> | F        | S        | T        | S        | I | Type1 | S | A        | K | A        | V |
| V97  | India     | 2013 | Y | <u>L</u> | <u>K</u> | F        | S        | T        | S        | I | Type1 | S | A        | K | A        | V |
| V103 | India     | 2013 | Y | <u>L</u> | WT       | F        | S        | T        | S        | I | Type2 | S | <u>G</u> | K | A        | V |
| V95  | India     | 2013 | Y | <u>L</u> | WT       | F        | S        | T        | S        | I | Type1 | S | A        | K | A        | V |
| V96  | India     | 2013 | Y | <u>L</u> | WT       | F        | S        | T        | S        | I | Type1 | S | A        | K | A        | V |
| V98  | India     | 2013 | Y | <u>L</u> | WT       | F        | S        | T        | S        | I | Type1 | S | A        | K | A        | V |
| V105 | India     | 2013 | Y | <u>L</u> | WT       | F        | S        | T        | S        | I | Type1 | S | A        | K | A        | V |
| V106 | Pakistan  | 2013 | Y | <u>L</u> | WT       | F        | S        | T        | S        | I | Type1 | S | A        | K | A        | V |
| V101 | Thailand  | 2013 | Y | <u>L</u> | WT       | F        | S        | T        | S        | I | Type1 | S | A        | K | A        | V |
| V99  | India     | 2013 |   |          | <u>K</u> | F        | <u>R</u> | T        | <u>N</u> | I | Type1 | S | <u>G</u> | K | <u>G</u> | V |
| V114 | India     | 2013 | Y | <u>L</u> |          | F        | S        | T        | S        | I | Type1 | S | A        | K | A        | V |
| V110 | India     | 2013 | Y | F        |          |          |          |          |          |   |       |   |          |   |          |   |
| V70  | SEAN*     | 2014 | F | <u>L</u> | <u>K</u> | <u>L</u> | <u>R</u> | <u>M</u> | <u>T</u> | I | Type1 | S | <u>G</u> | K | <u>G</u> | V |
| V64  | India     | 2014 | Y | F        | <u>K</u> | F        | <u>R</u> | T        | <u>N</u> | I | Type1 | S | <u>G</u> | K | <u>G</u> | V |
| V65  | Indonesia | 2014 | F | <u>L</u> | WT       | <u>L</u> | <u>R</u> | <u>M</u> | <u>T</u> | I | Type1 | S | A        | K | A        | V |
| V59  | India     | 2014 | Y | F        | WT       | F        | <u>R</u> | T        | <u>N</u> | I | Type1 | S | <u>G</u> | K | <u>G</u> | V |
| V60  | India     | 2014 | Y | F        | WT       | F        | <u>R</u> | T        | <u>N</u> | I | Type1 | S | <u>G</u> | K | <u>G</u> | V |
| V73  | Solomon*  | 2014 | Y | <u>L</u> | WT       | <u>L</u> | <u>R</u> | <u>M</u> | <u>T</u> | I | Type3 | S | A        | K | A        | V |
| V67  | Pakistan  | 2014 | Y | <u>L</u> | WT       | F        | <u>R</u> | T        | <u>N</u> | I | Type1 | S | A        | K | A        | V |
| V68  | Pakistan  | 2014 | Y | <u>L</u> | WT       | F        | <u>R</u> | T        | <u>N</u> | I | Type1 | S | A        | K | A        | V |
| V72  | India     | 2014 | Y | <u>L</u> | WT       | <u>L</u> | <u>R</u> | T        | S        | I | Type2 | S | A        | K | A        | V |
| V63  | India     | 2014 | Y | F        | <u>K</u> | F        | S        | T        | S        | I | Type1 | S | A        | K | A        | V |
| V74  | India     | 2014 |   |          | WT       | F        | <u>R</u> | T        | <u>N</u> | I | Type1 | S | A        | K | A        | V |
| V61  | India     | 2014 | Y | <u>L</u> | WT       |          |          |          |          |   |       | S | A        | K | A        | V |
| V40  | PNG*      | 2015 | F | <u>L</u> | WT       | <u>L</u> | <u>R</u> | <u>M</u> | <u>T</u> | I | Type3 | S | A        | K | A        | V |

|      |           |      |          |          |          |          |          |          |          |   |       |   |          |   |          |   |
|------|-----------|------|----------|----------|----------|----------|----------|----------|----------|---|-------|---|----------|---|----------|---|
| V49  | India     | 2015 | Y        | <u>L</u> | <u>K</u> | F        | <u>R</u> | T        | <u>N</u> | I | Type1 | S | A        | K | A        | V |
| V48  | Pakistan  | 2015 | Y        | <u>L</u> | WT       | F        | S        | T        | <u>N</u> | I | Type1 | S | A        | K | A        | V |
| V47  | Pakistan  | 2015 | Y        | <u>L</u> | WT       | F        | S        | T        | S        | I | Type1 | S | A        | K | A        | V |
| V42  | Indonesia | 2015 | <u>F</u> | <u>L</u> |          | <u>L</u> | <u>R</u> | <u>M</u> | <u>T</u> | I | Type1 | S | A        | K | <u>G</u> | V |
| V43  | India     | 2015 | Y        | <u>L</u> |          |          |          |          |          |   |       | S | A        | K | A        | V |
| V50  | India     | 2015 |          |          |          | F        | <u>R</u> | T        | <u>N</u> | I | Type1 |   |          |   |          |   |
| V20  | PNG*      | 2016 | <u>F</u> | <u>L</u> | WT       | <u>L</u> | <u>R</u> | <u>M</u> | <u>T</u> | I | Type3 | S | A        | K | A        | V |
| V25  | India     | 2016 | Y        | <u>L</u> | WT       | F        | S        | T        | S        | I | Type1 | S | A        | K | <u>G</u> | V |
| V29  | India     | 2016 | Y        | F        | WT       | <u>L</u> | <u>R</u> | <u>M</u> | <u>T</u> | I | Type3 | S | A        | K | A        | V |
| V24  | India     | 2016 | Y        | <u>L</u> | WT       | F        | S        | T        | S        | I | Type1 | S | A        | K | A        | V |
| V31  | India     | 2016 | Y        | <u>L</u> | WT       | F        | S        | T        | S        | I | Type1 | S | A        | K | A        | V |
| V32  | India     | 2016 |          |          | WT       | F        | S        | T        | S        | I | Type1 | S | A        | K | A        | V |
| V34  | India     | 2016 | Y        | <u>L</u> | WT       |          |          |          |          |   |       | S | A        | K | A        | V |
| V3   | PNG*      | 2017 | <u>F</u> | <u>L</u> | WT       | <u>L</u> | <u>R</u> | <u>M</u> | <u>T</u> | I | Type1 | S | <u>G</u> | K | <u>G</u> | V |
| V11  | India     | 2017 | <u>F</u> | F        | <u>K</u> | F        | <u>R</u> | T        | <u>N</u> | I | Type1 | S | A        | K | A        | V |
| V5   | India     | 2017 | <u>F</u> | F        | <u>K</u> | F        | S        | T        | S        | I | Type1 | S | A        | K | A        | V |
| V6   | India     | 2017 | <u>F</u> | F        | <u>K</u> | F        | S        | T        | S        | I | Type1 | S | A        | K | A        | V |
| V18  | PNG*      | 2017 | Y        | <u>L</u> | WT       | <u>L</u> | <u>R</u> | T        | S        | I | Type1 | S | A        | K | A        | V |
| V1   | India     | 2017 | <u>F</u> | F        | WT       | F        | S        | T        | S        | I | Type1 | S | A        | K | A        | V |
| V7   | India     | 2017 | <u>F</u> | F        | WT       | F        | S        | T        | S        | I | Type1 | S | A        | K | A        | V |
| V8   | India     | 2017 | <u>F</u> | F        | WT       | F        | S        | T        | S        | I | Type1 | S | A        | K | A        | V |
| V9   | India     | 2017 | <u>F</u> | F        | WT       | F        | S        | T        | S        | I | Type1 | S | A        | K | A        | V |
| V14  | India     | 2017 | Y        | <u>L</u> | WT       | F        | S        | T        | S        | I | Type1 | S | A        | K | A        | V |
| V15  | India     | 2017 | Y        | <u>L</u> | WT       | F        | S        | T        | S        | I | Type1 | S | A        | K | A        | V |
| V13  | India     | 2017 |          |          | WT       | F        | S        | T        | <u>N</u> | I | Type1 | S | A        | K | A        | V |
| V16  | Pakistan  | 2017 | Y        | <u>L</u> |          | F        | <u>R</u> | T        | <u>N</u> | I | Type1 | S | A        | K | A        | V |
| V12  | PNG*      | 2017 | <u>F</u> | <u>L</u> |          | <u>L</u> | <u>R</u> | <u>M</u> | <u>T</u> | I | Type3 | S | A        | K | A        | V |
| V19  | PNG*      | 2017 | <u>F</u> | <u>L</u> | WT       | <u>L</u> | <u>R</u> | <u>M</u> | <u>T</u> | I | Type1 |   |          |   |          |   |
| V314 | India     | 2018 | Y        | <u>L</u> | WT       | F        | S        | T        | S        | I | Type1 | S | A        | K | A        | V |

|      |             |      |          |          |  |          |          |          |          |   |       |   |   |   |   |   |
|------|-------------|------|----------|----------|--|----------|----------|----------|----------|---|-------|---|---|---|---|---|
| V310 | Pakistan    | 2018 | Y        | <u>L</u> |  | F        | S        | T        | S        | I | Type1 | S | A | K | A | V |
| V312 | Pakistan    | 2018 | Y        | <u>L</u> |  | F        | S        | T        | S        | I | Type1 | S | A | K | A | V |
| V313 | Pakistan    | 2018 | Y        | <u>L</u> |  | F        | S        | T        | S        | I | Type3 | S | A | K | A | V |
| V315 | India       | 2018 | Y        | <u>L</u> |  | F        | S        | T        | S        | I | Type2 | S | A | K | A | V |
| V316 | South Korea | 2018 | Y        | <u>L</u> |  | F        | S        | T        | N        | I | Type2 | S | A | K | A | V |
| V317 | PNG*        | 2018 | <u>F</u> | <u>L</u> |  | <u>L</u> | <u>R</u> | <u>M</u> | <u>T</u> | I | Type3 | S | A | K | A | V |
| V318 | Pakistan    | 2018 | Y        | <u>L</u> |  | F        | S        | T        | S        | I | Type1 | S | A | K | A | V |
| V319 | Pakistan    | 2018 | Y        | <u>L</u> |  | F        | S        | T        | S        | I | Type2 | S | A | K | A | V |
| V321 | Pakistan    | 2018 | Y        | <u>L</u> |  | F        | S        | T        | S        | I | Type2 | S | A | K | A | V |

SEAN = Southeast Asian Nations

PNG = Papua New Guinea

Solomon = Solomon Islands

*Pvmdr1* = *P. vivax* multidrug resistance gene

*Pvcrt-o* = *P. vivax* putative transporter protein gene

*Pvdhfr* = *P. vivax* dihydrofolate reductase gene

*Pvdhps* = *P. vivax* dihydropteroate synthase gene

\*The nomenclature of the repeat variants followed that of Tantiamornkul et al. 2018.

**Table S3:** The table of mutations in four genes found in Indian samples between 2008 and 2018

| ID   | Year | <i>Pvmdr1</i> |                | <i>Pvcrt-o</i>           | <i>Pvdhfr</i>  |              |              |                 |                 | <i>Pvdhps</i> |               |                 |               |               |
|------|------|---------------|----------------|--------------------------|----------------|--------------|--------------|-----------------|-----------------|---------------|---------------|-----------------|---------------|---------------|
|      |      | Y976 <u>F</u> | F1076 <u>L</u> | <u>K</u> 10<br>insertion | F57 <u>L/I</u> | S58 <u>R</u> | T61 <u>M</u> | S117 <u>T/N</u> | I173 <u>L/F</u> | S382 <u>A</u> | A383 <u>G</u> | K512 <u>M/E</u> | A553 <u>G</u> | V585 <u>A</u> |
| V299 | 2008 | Y             | <u>L</u>       | WT                       | F              | <u>R</u>     | T            | <u>N</u>        | I               | S             | A             | K               | A             | V             |
| V225 | 2008 | Y             | <u>L</u>       | WT                       | F              | S            | T            | S               | I               | S             | A             | K               | A             | V             |
| V243 | 2008 | Y             | <u>L</u>       | WT                       | F              | S            | T            | S               | I               | S             | A             | K               | A             | V             |
| V249 | 2008 | Y             | <u>L</u>       | WT                       | F              | S            | T            | S               | I               | S             | A             | K               | A             | V             |
| V296 | 2008 | Y             | <u>L</u>       | WT                       | F              | S            | T            | S               | I               | S             | A             | K               | A             | V             |
| V183 | 2009 | Y             | <u>L</u>       | WT                       | <u>L</u>       | <u>R</u>     | <u>M</u>     | <u>T</u>        | I               | S             | A             | K               | A             | V             |
| V197 | 2009 | Y             | <u>L</u>       | WT                       | F              | S            | T            | S               | I               | S             | A             | K               | A             | V             |
| V302 | 2009 | Y             | <u>L</u>       | WT                       | F              | S            | T            | S               | I               | S             | A             | K               | A             | V             |
| V174 | 2010 | Y             | <u>L</u>       | WT                       | F              | <u>R</u>     | T            | <u>N</u>        | I               | S             | <u>G</u>      | K               | <u>G</u>      | V             |
| V180 | 2010 | Y             | <u>L</u>       | WT                       | F              | <u>R</u>     | T            | <u>N</u>        | I               | S             | A             | K               | A             | V             |
| V177 | 2010 | Y             | <u>L</u>       | WT                       | F              | S            | T            | S               | I               | S             | A             | K               | A             | V             |
| V167 | 2010 | Y             | <u>L</u>       |                          | F              | <u>R</u>     | T            | <u>N</u>        | I               | S             | A             | K               | A             | V             |
| V142 | 2011 | Y             | <u>L</u>       |                          |                |              |              |                 |                 | S             | A             | K               | A             | V             |
| V149 | 2012 | Y             | <u>L</u>       | WT                       | F              | <u>R</u>     | T            | <u>N</u>        | I               | S             | A             | K               | A             | V             |
| V126 | 2012 | Y             | <u>L</u>       | WT                       | F              | S            | T            | <u>N</u>        | I               | S             | A             | K               | A             | V             |
| V151 | 2012 | Y             | <u>L</u>       | WT                       | F              | S            | T            | S               | I               | S             | A             | K               | A             | V             |
| V102 | 2013 | F             | <u>L</u>       | WT                       | <u>I</u>       | <u>R</u>     | <u>M</u>     | <u>T</u>        | I               | S             | <u>G</u>      | K               | <u>G</u>      | V             |
| V93  | 2013 | Y             | <u>L</u>       | <u>K</u>                 | F              | S            | T            | S               | I               | S             | A             | K               | A             | V             |
| V97  | 2013 | Y             | <u>L</u>       | <u>K</u>                 | F              | S            | T            | S               | I               | S             | A             | K               | A             | V             |
| V103 | 2013 | Y             | <u>L</u>       | WT                       | F              | S            | T            | S               | I               | S             | <u>G</u>      | K               | A             | V             |
| V95  | 2013 | Y             | <u>L</u>       | WT                       | F              | S            | T            | S               | I               | S             | A             | K               | A             | V             |
| V96  | 2013 | Y             | <u>L</u>       | WT                       | F              | S            | T            | S               | I               | S             | A             | K               | A             | V             |
| V98  | 2013 | Y             | <u>L</u>       | WT                       | F              | S            | T            | S               | I               | S             | A             | K               | A             | V             |

|      |      |          |          |          |          |          |          |          |   |   |          |   |          |   |
|------|------|----------|----------|----------|----------|----------|----------|----------|---|---|----------|---|----------|---|
| V105 | 2013 | Y        | <u>L</u> | WT       | F        | S        | T        | S        | I | S | A        | K | A        | V |
| V99  | 2013 |          |          | <u>K</u> | F        | <u>R</u> | T        | <u>N</u> | I | S | <u>G</u> | K | <u>G</u> | V |
| V114 | 2013 | Y        | <u>L</u> |          | F        | S        | T        | S        | I | S | A        | K | A        | V |
| V110 | 2013 | Y        | F        |          |          |          |          |          |   |   |          |   |          |   |
| V64  | 2014 | Y        | F        | <u>K</u> | F        | <u>R</u> | T        | <u>N</u> | I | S | <u>G</u> | K | <u>G</u> | V |
| V59  | 2014 | Y        | F        | WT       | F        | <u>R</u> | T        | <u>N</u> | I | S | <u>G</u> | K | <u>G</u> | V |
| V60  | 2014 | Y        | F        | WT       | F        | <u>R</u> | T        | <u>N</u> | I | S | <u>G</u> | K | <u>G</u> | V |
| V72  | 2014 | Y        | <u>L</u> | WT       | <u>L</u> | <u>R</u> | T        | S        | I | S | A        | K | A        | V |
| V63  | 2014 | Y        | F        | <u>K</u> | F        | S        | T        | S        | I | S | A        | K | A        | V |
| V74  | 2014 |          |          | WT       | F        | <u>R</u> | T        | <u>N</u> | I | S | A        | K | A        | V |
| V61  | 2014 | Y        | <u>L</u> | WT       |          |          |          |          |   | S | A        | K | A        | V |
| V49  | 2015 | Y        | <u>L</u> | <u>K</u> | F        | <u>R</u> | T        | <u>N</u> | I | S | A        | K | A        | V |
| V43  | 2015 | Y        | <u>L</u> |          |          |          |          |          |   | S | A        | K | A        | V |
| V50  | 2015 |          |          |          | F        | <u>R</u> | T        | <u>N</u> | I |   |          |   |          |   |
| V25  | 2016 | Y        | <u>L</u> | WT       | F        | S        | T        | S        | I | S | A        | K | <u>G</u> | V |
| V29  | 2016 | Y        | F        | WT       | <u>L</u> | <u>R</u> | <u>M</u> | <u>T</u> | I | S | A        | K | A        | V |
| V24  | 2016 | Y        | <u>L</u> | WT       | F        | S        | T        | S        | I | S | A        | K | A        | V |
| V31  | 2016 | Y        | <u>L</u> | WT       | F        | S        | T        | S        | I | S | A        | K | A        | V |
| V32  | 2016 |          |          | WT       | F        | S        | T        | S        | I | S | A        | K | A        | V |
| V34  | 2016 | Y        | <u>L</u> | WT       |          |          |          |          |   | S | A        | K | A        | V |
| V11  | 2017 | <u>F</u> | F        | <u>K</u> | F        | <u>R</u> | T        | <u>N</u> | I | S | A        | K | A        | V |
| V5   | 2017 | <u>F</u> | F        | <u>K</u> | F        | S        | T        | S        | I | S | A        | K | A        | V |
| V6   | 2017 | <u>F</u> | F        | <u>K</u> | F        | S        | T        | S        | I | S | A        | K | A        | V |
| V1   | 2017 | <u>F</u> | F        | WT       | F        | S        | T        | S        | I | S | A        | K | A        | V |
| V7   | 2017 | <u>F</u> | F        | WT       | F        | S        | T        | S        | I | S | A        | K | A        | V |
| V8   | 2017 | <u>F</u> | F        | WT       | F        | S        | T        | S        | I | S | A        | K | A        | V |
| V9   | 2017 | <u>F</u> | F        | WT       | F        | S        | T        | S        | I | S | A        | K | A        | V |
| V14  | 2017 | Y        | <u>L</u> | WT       | F        | S        | T        | S        | I | S | A        | K | A        | V |
| V15  | 2017 | Y        | <u>L</u> | WT       | F        | S        | T        | S        | I | S | A        | K | A        | V |



|      |      |   |          |    |   |   |   |          |   |   |   |   |   |   |
|------|------|---|----------|----|---|---|---|----------|---|---|---|---|---|---|
| V13  | 2017 |   |          | WT | F | S | T | <u>N</u> | I | S | A | K | A | V |
| V314 | 2018 | Y | <u>L</u> | WT | F | S | T | S        | I | S | A | K | A | V |
| V315 | 2018 | Y | <u>L</u> |    | F | S | T | S        | I | S | A | K | A | V |

---

*Pvmdr1* = *P. vivax* multidrug resistance gene

*Pvcrt-o* = *P. vivax* putative transporter protein gene

*Pvdhfr* = *P. vivax* dihydrofolate reductase gene

*Pvdhps* = *P. vivax* dihydropteroate synthase gene

**Table S4:** The table of orthologous genes associated with drug resistance between *P. falciparum* and *P. vivax*

| <i>Plasmodium falciparum</i> |                 | <i>Plasmodium vivax</i> |                             | Reference             |
|------------------------------|-----------------|-------------------------|-----------------------------|-----------------------|
| Genes                        | Point Mutations | Orthologous Genes       | Orthologous Point Mutations |                       |
| <i>Pfmdr</i>                 |                 | <i>Pvmdr</i>            |                             | Suwanarusk et al 2007 |
| <i>Pfcrt</i>                 |                 | <i>Pvcrt</i>            |                             | Suwanarusk et al 2007 |
| <i>Pfdhfr</i>                | 59              | <i>Pvdhfr</i>           | 58                          | Hawkins et al 2007    |
|                              | 108             |                         | 117                         |                       |
|                              | 164             |                         | 173                         |                       |
| <i>Pfdhps</i>                | 437             | <i>Pvdhps</i>           | 383                         | Hawkins et al 2007    |
|                              | 540             |                         | 512                         |                       |
|                              | 581             |                         | 553                         |                       |

*Pfmdr* gene; a multidrug resistance gene in *P. falciparum*, *Pfcrt* gene; a putative transporter protein gene in *P. falciparum*, *Pfdhfr* gene; dihydrofolate reductase gene in *P. falciparum*, *Pfdhps* gene; dihydropteroate synthetase gene in *P. falciparum*, *Pvmdr* gene; a multidrug resistance gene in *P. vivax*, *Pvcrt* gene; a putative transporter protein gene in *P. vivax*, *Pvdhfr* gene; dihydrofolate reductase gene in *P. vivax*, and *Pvdhps* gene; dihydropteroate synthetase gene in *P. vivax*
